# Supplementary material
Source: MDPI journal article supplement (https://www.mdpi.com/1099-4300/15/9/3734)
Supplement: s1 [file s1]

## Errata for

E. E. Santiso, C. Herdes and E. A. Müller “On the Calculation of Solid-Fluid Contact Angles from Molecular Dynamics” *Entropy* **2013**, *15*, 3734-3745;  
doi:10.3390/e15093734

Equation (2) of the above paper should read

$$u(r) = \left( \frac{\lambda_r}{\lambda_r - \lambda_a} \right) \left( \frac{\lambda_r}{\lambda_a} \right)^{\frac{\lambda_a}{\lambda_r - \lambda_a}} \mathcal{E} \left[ \left( \frac{\sigma}{r} \right)^{\lambda_r} - \left( \frac{\sigma}{r} \right)^{\lambda_a} \right] = A r^{-\lambda_r} - C r^{-\lambda_a} \quad (2)$$

The typographical error (an exponent missing in the left hand side expression) has no effect whatsoever on the results of paper, as all calculations were performed using the correct expression with the parameters given in Table 1.
